# Supplementary material
Source: HighWire-hosted journal article supplement (https://bmjopen.bmj.com/content/12/3/e054927)
Supplement: inline-supplementary-material-1 [file inline-supplementary-material-1.pdf]

## INTERVIEW SCHEDULE

### Peripheral intravenous cannulation decision making in emergency settings:

#### A qualitative descriptive study.

This interview will focus on the clinical decision making for PIVC usage in the emergency health care setting.

| Time         | Activity                                                                                                                                                                                                                                                                                                                                                                                                                                                                                                                                                                                                                                                                                                                                                                                                                                                                                                                                                                                                                                                                                                                                                                                                                                                                                                                                                                                                                                                                                                                                                                                                                                                                                                                                |
|--------------|-----------------------------------------------------------------------------------------------------------------------------------------------------------------------------------------------------------------------------------------------------------------------------------------------------------------------------------------------------------------------------------------------------------------------------------------------------------------------------------------------------------------------------------------------------------------------------------------------------------------------------------------------------------------------------------------------------------------------------------------------------------------------------------------------------------------------------------------------------------------------------------------------------------------------------------------------------------------------------------------------------------------------------------------------------------------------------------------------------------------------------------------------------------------------------------------------------------------------------------------------------------------------------------------------------------------------------------------------------------------------------------------------------------------------------------------------------------------------------------------------------------------------------------------------------------------------------------------------------------------------------------------------------------------------------------------------------------------------------------------|
| 0 – 10 mins  | <ul style="list-style-type: none"> <li>• Introduction of the research team</li> <li>• Reiterate information on 'invitation and information sheet' and 'consent form'</li> <li>• Ensure consent form has been signed</li> </ul>                                                                                                                                                                                                                                                                                                                                                                                                                                                                                                                                                                                                                                                                                                                                                                                                                                                                                                                                                                                                                                                                                                                                                                                                                                                                                                                                                                                                                                                                                                          |
| 10 – 45 mins | <p>Ice breaker questions:</p> <ul style="list-style-type: none"> <li>• What is your clinical background?</li> <li>• What are your thoughts on PIVC use?</li> <li>• How many PIVCs would you use on an average day?</li> </ul> <p>Exploratory questions:</p> <ul style="list-style-type: none"> <li>• Can you tell me about a typical patient who has a PIVC inserted/removed?</li> <li>• Can you tell me about a time when you decided to insert, use and remove a PIVC, from the moment you became involved in the patients care to the time they left your care?</li> </ul> <p>Decision making questions:</p> <p>If these questions have not been addressed during the above, ask at this point. Ask the participant to provide clinical examples for each.</p> <ul style="list-style-type: none"> <li>• How do you decide if a patient needs a PIVC?</li> <li>• What approaches do you use to make this determination?</li> </ul> <p>Research objective questions:</p> <p>If these questions have not been addressed during the above, ask at this point. Ask the participant to provide clinical examples for each.</p> <ul style="list-style-type: none"> <li>• What influences your decision to insert a PIVC?</li> <li>• What influences your decision to use a PIVC?</li> <li>• What influences your decision to remove a PIVC?</li> <li>• What influences your decision about the risks of PIVC usage?</li> <li>• What influences your decision about the benefits of PIVC usage?</li> <li>• What do you perceive to be the risks or benefits?</li> </ul> <ul style="list-style-type: none"> <li>• Is there anything that you would like to add your experience with using PIVC (insertion, usage, and/or removal)?</li> </ul> |
| 45 – 70 mins | <ul style="list-style-type: none"> <li>• Summary of research process to-date and expected outcomes,</li> <li>• Reiterate the information on the 'invitation and information sheet' and 'consent form'</li> </ul>                                                                                                                                                                                                                                                                                                                                                                                                                                                                                                                                                                                                                                                                                                                                                                                                                                                                                                                                                                                                                                                                                                                                                                                                                                                                                                                                                                                                                                                                                                                        |

#### Key phrases

**Exploring** – *Can you tell me more about ... ?*

**Validating** – *So, is what you are saying ... ?*

PIVC Interview Schedule  
v 1.1 22/7/19
